# Supplementary material for: An Ag2S@ZIF-Van nanosystem for NIR-II imaging of bacterial-induced inflammation and treatment of wound bacterial infection
Source: Royal Society of Chemistry journal article supplement (doi:10.1039/d2bm00550f), 2022-01-01
Supplement: d2bm00550f1.pdf [file d2bm00550f1.pdf]

# Supporting Information

## **An Ag<sub>2</sub>S@ZIF-Van nanosystem for NIR-II imaging of bacterial-induced inflammation and treatment of wound bacterial infection**

Yao Huang<sup>a</sup>, Hongchao Geng<sup>a</sup>, Zeming Wu<sup>b</sup>, Leilei Sun<sup>a</sup>, Chenhui Ji<sup>a</sup>, Craig A. Grimes<sup>c</sup>, Xinxin Feng<sup>a,\*</sup>, Qingyun Cai<sup>a,\*</sup>

<sup>a</sup>State Key Laboratory of Chemo/Biosensing and Chemometrics, College of Chemistry and Chemical Engineering, Hunan University, Changsha 410082, Hunan, China

<sup>b</sup>Inner Mongolia Environmental Monitoring Center, Hohhot 010011, Inner Mongolia, China

<sup>c</sup>Flux Photon Corporation, Alpharetta, Georgia 30005, United States

Corresponding Author: [qycail0001@hnu.edu.cn](mailto:qycail0001@hnu.edu.cn)

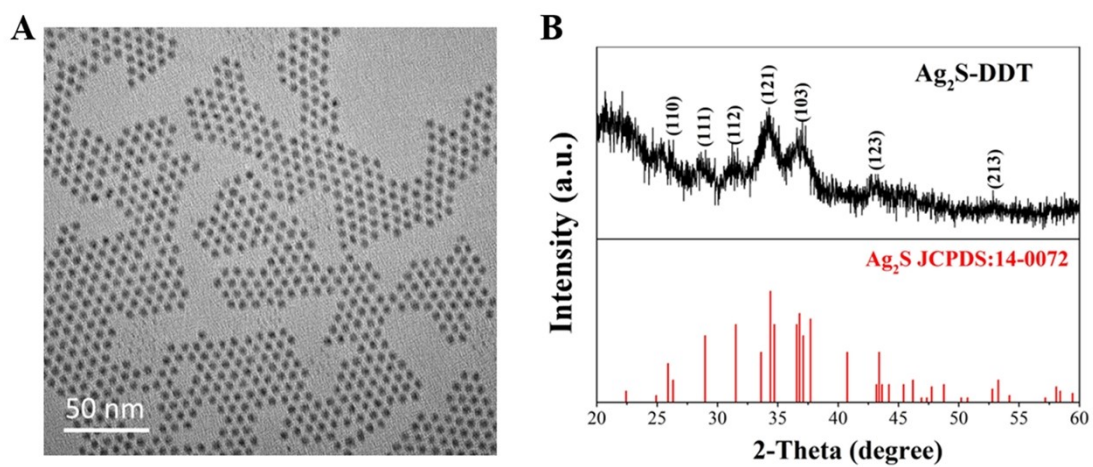

**Fig. S1** (A) TEM image of  $\text{Ag}_2\text{S}$ -DDT; (B) XRD spectrum of  $\text{Ag}_2\text{S}$ -DDT.

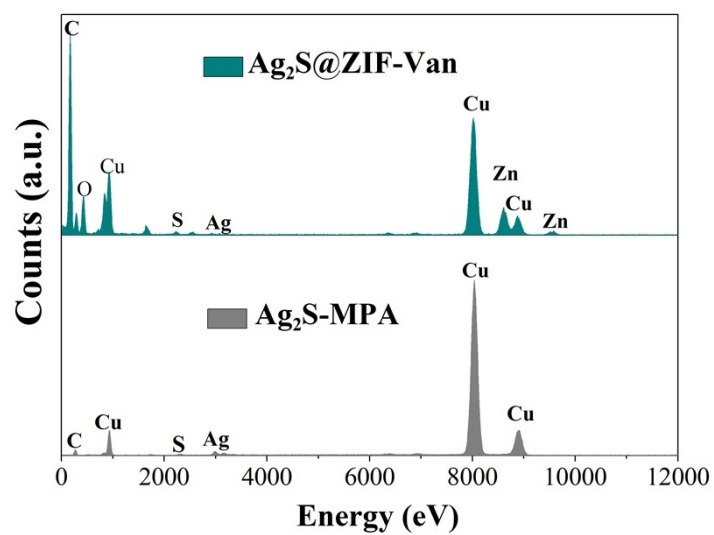

**Fig. S2** The EDS spectra of  $\text{Ag}_2\text{S}$ -MPA and  $\text{Ag}_2\text{S}$ @ZIF-Van.

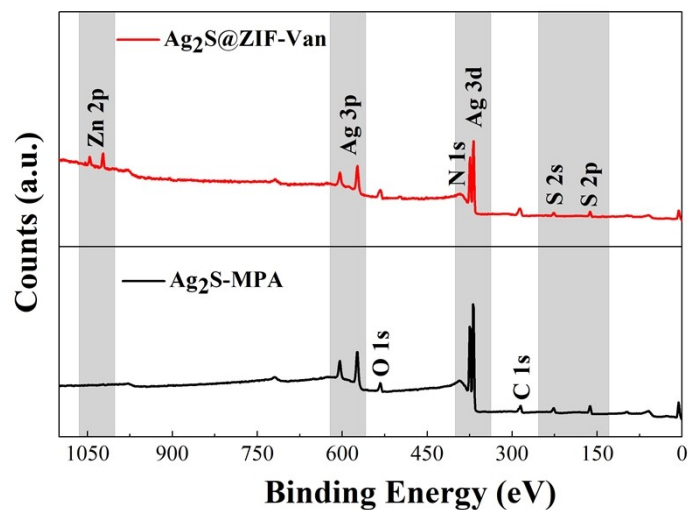

Fig. S3 The XPS spectra of Ag<sub>2</sub>S-MPA and Ag<sub>2</sub>S@ZIF-Van.

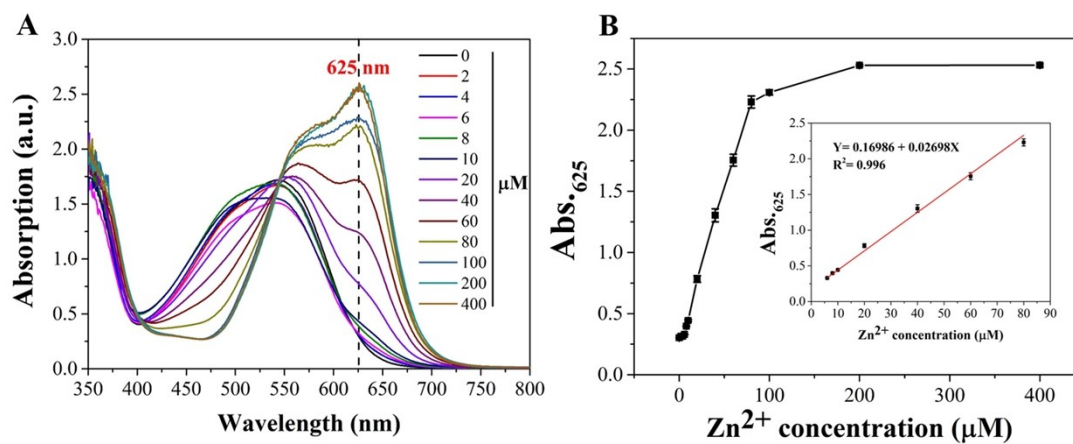

Fig. S4 (A) The absorption spectra of Zincon monosodium salt after combined with different concentration of Zn<sup>2+</sup> ions; (B) The curve and fitted linear relationship (inset picture) between absorption intensity at 625 nm and the concentrations of Zn<sup>2+</sup> ions.

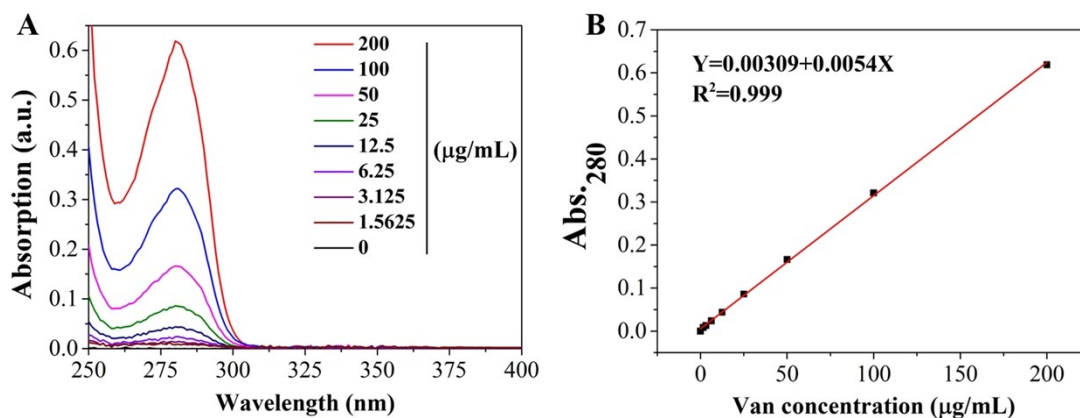

**Fig. S5** (A) The absorption spectra of different concentration of Van; (B) The fitted linear relationship between absorption intensity at 280 nm and the concentrations of Van .

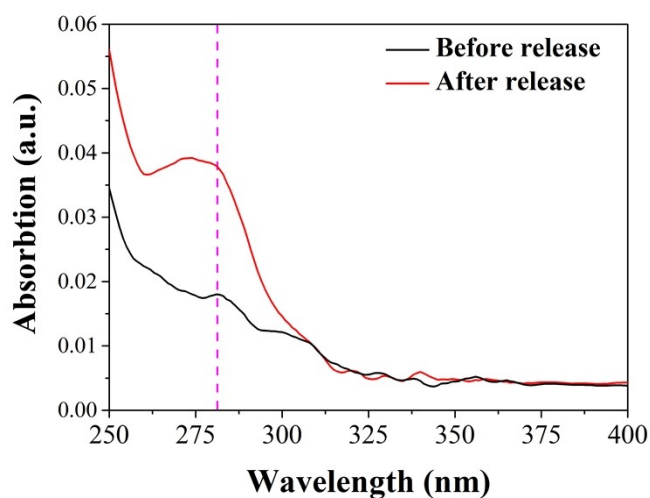

**Fig. S6** The absorption spectra of the centrifugal supernatant of  $\text{Ag}_2\text{S}@ZIF\text{-Van}$  in before release (black line) and after release (red line) for calculating the Van contents in  $\text{Ag}_2\text{S}@ZIF\text{-Van}$  (100  $\mu\text{g/mL}$ ).

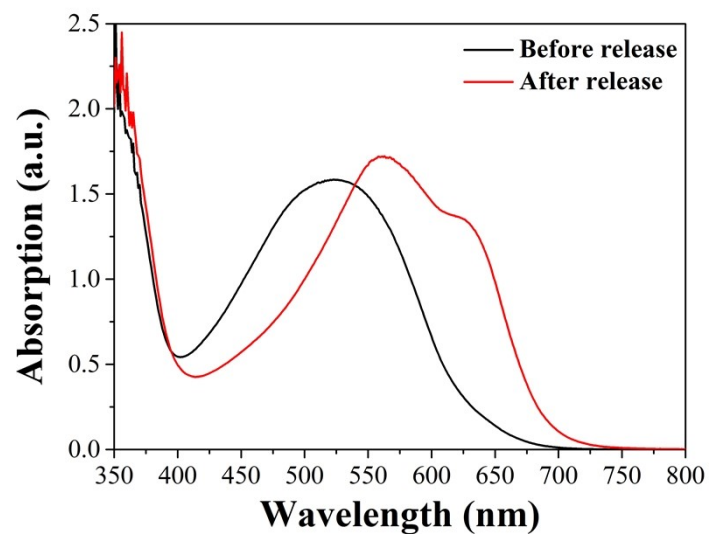

**Fig. S7** The absorption spectra of the Zincon monosodium salt after reaction with centrifugal supernatant of  $\text{Ag}_2\text{S@ZIF-Van}$  in before release (black line) and after release (red line) for calculating  $\text{Zn}^{2+}$  ions contents in  $\text{Ag}_2\text{S@ZIF-Van}$  ( $200 \mu\text{g/mL}$ ).

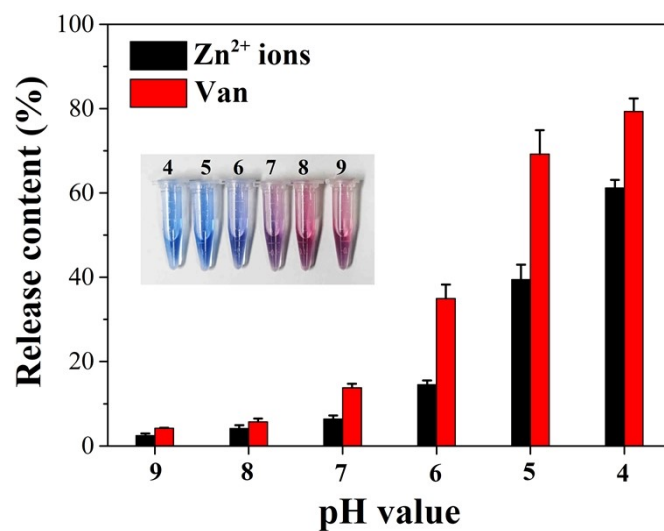

**Fig. S8** The  $\text{Ag}_2\text{S@ZIF-Van}$  release content of  $\text{Zn}^{2+}$  ions and Van after incubated 2 h in different pH environment and color change of Zincon monosodium salt solution (inset picture).

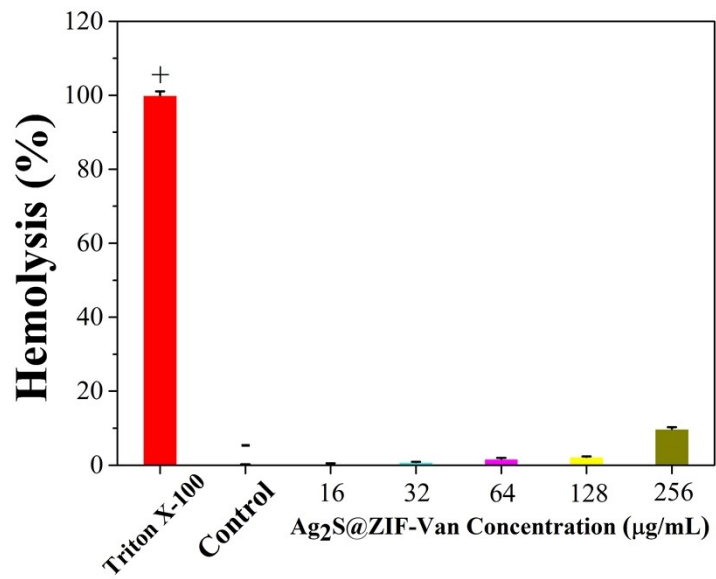

**Fig. S9** Hemolysis test of Ag<sub>2</sub>S@ZIF-Van at different concentrations.

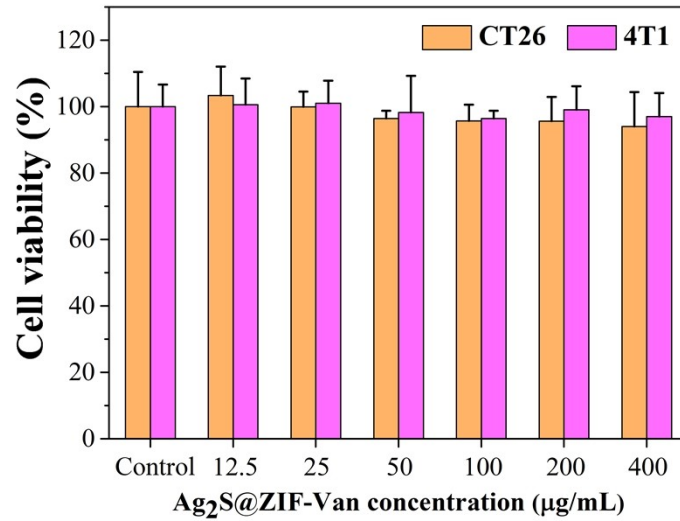

**Fig. S10** Cytotoxicity of Ag<sub>2</sub>S@ZIF-Van with different concentrations to CT26 and 4T1.

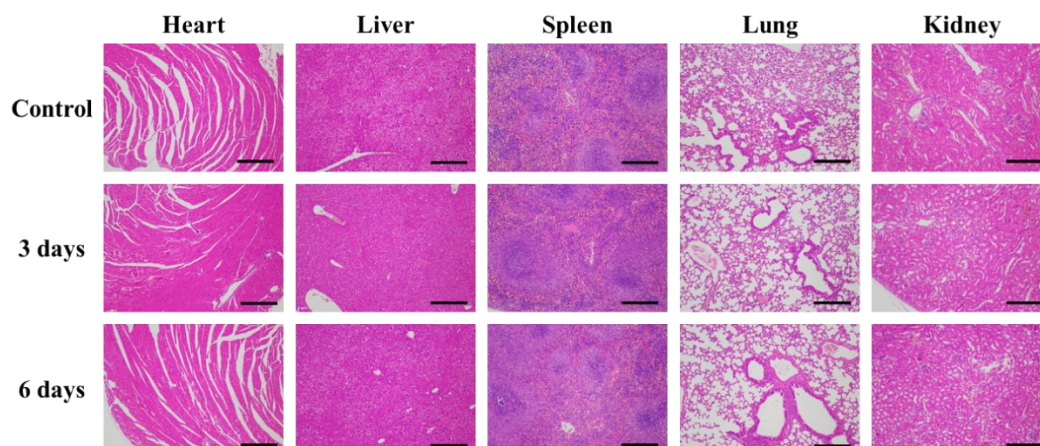

**Fig. S11** *In vivo* toxicity tests of  $\text{Ag}_2\text{S@ZIF-Van}$  by H&E-stained tissue sections (scale bar = 200  $\mu\text{m}$ ).

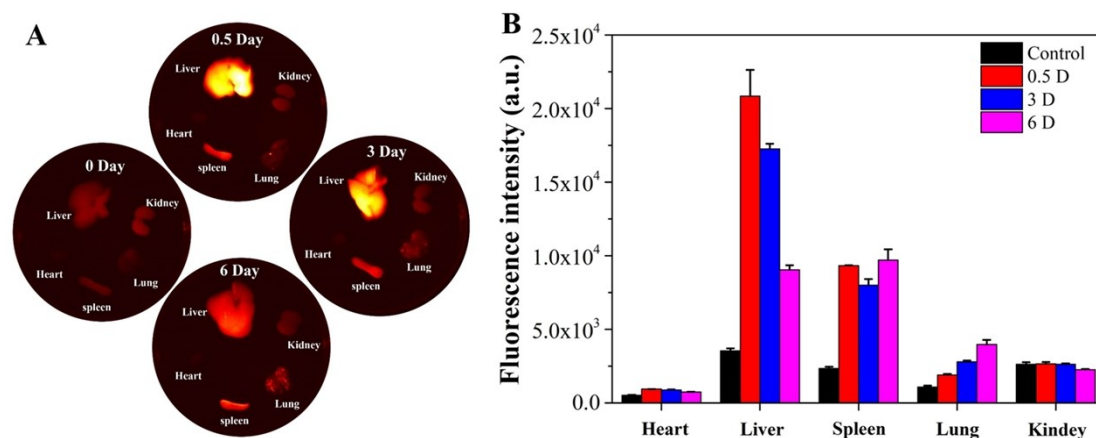

**Fig. S12** (A) Ex-vivo NIR-II fluorescent imaging of main organs from the mice treated with  $\text{Ag}_2\text{S@ZIF-Van}$  after 0.5 day, 3 day, 6 day post-injection under 808 nm NIR laser excitation (300  $\text{mW}/\text{cm}^2$ ) with NIR-II imaging system. (B) Fluorescence intensity of each organ corresponding to (A) as a function of time.

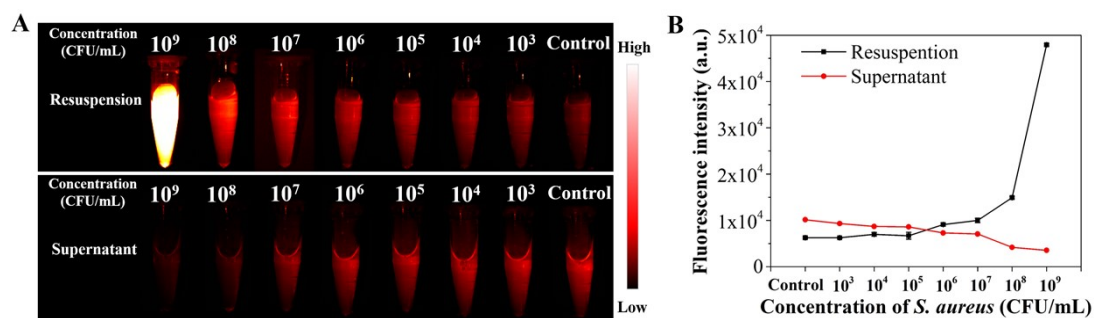

**Fig. S13** (A) NIR-II fluorescent imaging of resuspension and supernatant after incubation and then centrifugation of different concentrations of *S. aureus* with  $\text{Ag}_2\text{S}@ZIF\text{-Van}$ ; (B) The curve of optical signal intensity corresponding to (A).

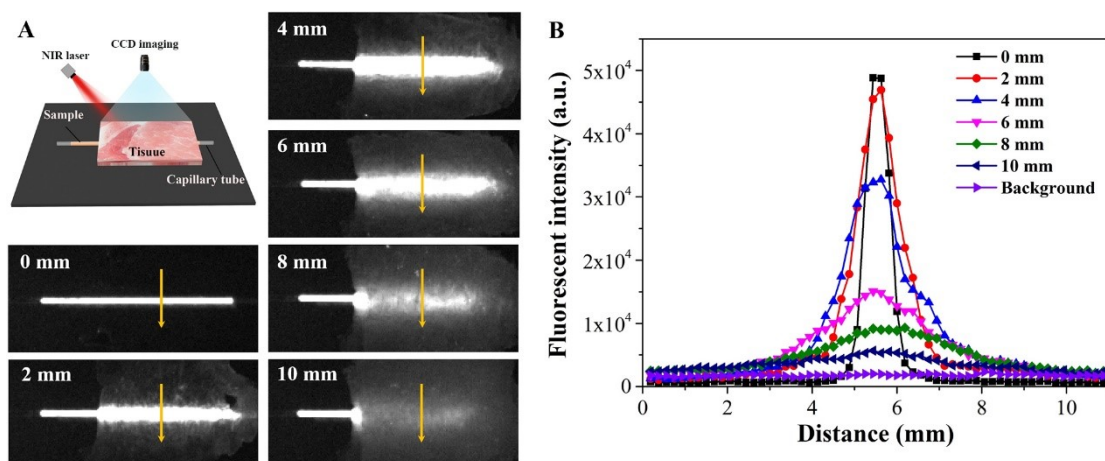

**Fig. S14** (A) The schematic diagram of tissue depth imaging experiment and NIR-II fluorescent images of  $\text{Ag}_2\text{S}@ZIF\text{-Van}$  at different tissue depths. (B) The fluorescence signal distribution at the yellow arrow position of different tissue depth imaging in (A).



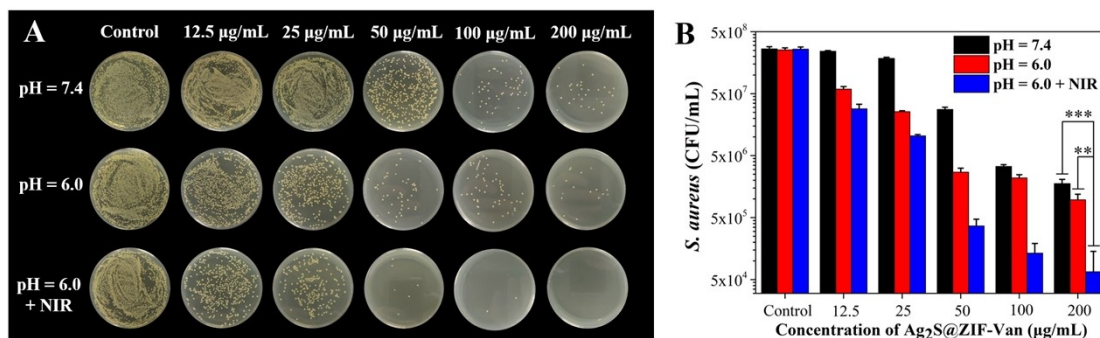

**Fig. S15** (A) Plate coating count of *S. aureus* after treatment with different concentration of Ag<sub>2</sub>S@ZIF-Van in various environment (pH = 7.4, pH = 6.0 or pH = 6.0 + NIR irradiation); (B) *S. aureus* count histogram corresponding to (A).

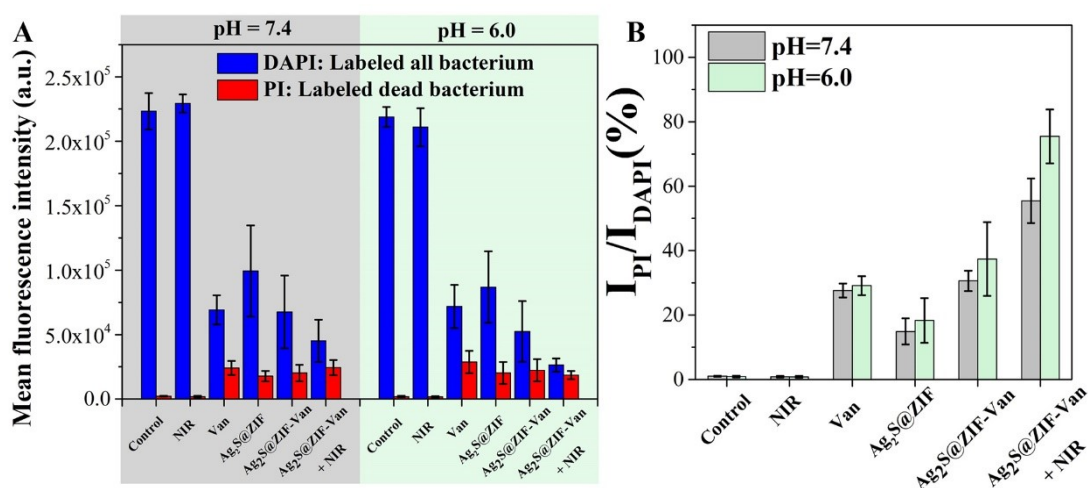

**Fig. S16** (A) The fluorescence analysis of confocal imaging of Fig. 4D; (B) The ratio of I<sub>PI</sub> to I<sub>DAPI</sub> fluorescence.

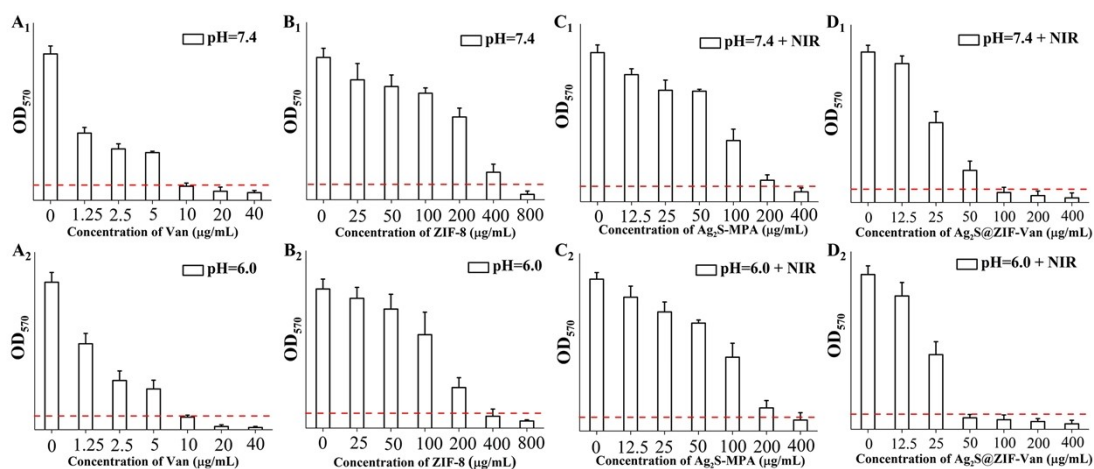

**Fig. S17** The OD<sub>570</sub> of wells after treatment with each anti-bacterial methods. The red line represents 90% bacteriostatic rate. (A<sub>1</sub>) and (A<sub>2</sub>): Van; (B<sub>1</sub>) and (B<sub>2</sub>): ZIF-8; (C<sub>1</sub>) and (C<sub>2</sub>): Ag<sub>2</sub>S-MPA + NIR irradiation; (D<sub>1</sub>) and (D<sub>2</sub>): Ag<sub>2</sub>S@ZIF-Van + NIR irradiation.

**Table S1** MIC<sub>(6h)</sub> of each anti-bacterial methods.

| Sample name                     | pH  | MIC <sub>(6h)</sub> |
|---------------------------------|-----|---------------------|
| Van                             | 7.4 | 10 μg/mL            |
|                                 | 6.0 | 10 μg/mL            |
| ZIF-8                           | 7.4 | >400 μg/mL          |
|                                 | 6.0 | 400 μg/mL           |
| Ag <sub>2</sub> S-MPA + NIR     | 7.4 | 400 μg/mL           |
|                                 | 6.0 | 400 μg/mL           |
| Ag <sub>2</sub> S@ZIF-Van + NIR | 7.4 | 100 μg/mL           |
|                                 | 6.0 | 50 μg/mL            |

Per 100 μg of Ag<sub>2</sub>S@ZIF-Van contains ~2 μg of Van, ~30 μg of Ag<sub>2</sub>S-MPA, ~68 μg of ZIF-8.

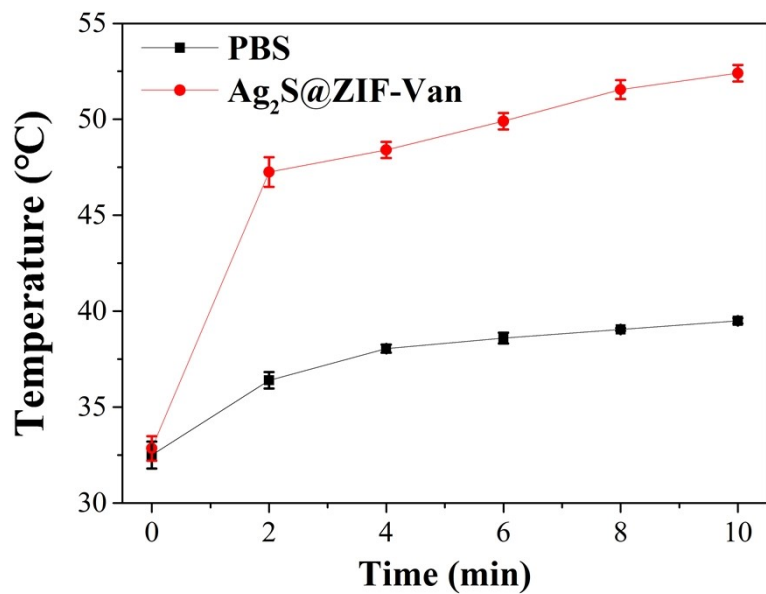

**Fig. S18** Temperature change curves of bacterial wound infection site after treatment with PBS solution and Ag<sub>2</sub>S@ZIF-Van under 808 nm laser (1.0 W/cm<sup>2</sup>) irradiation, respectively.

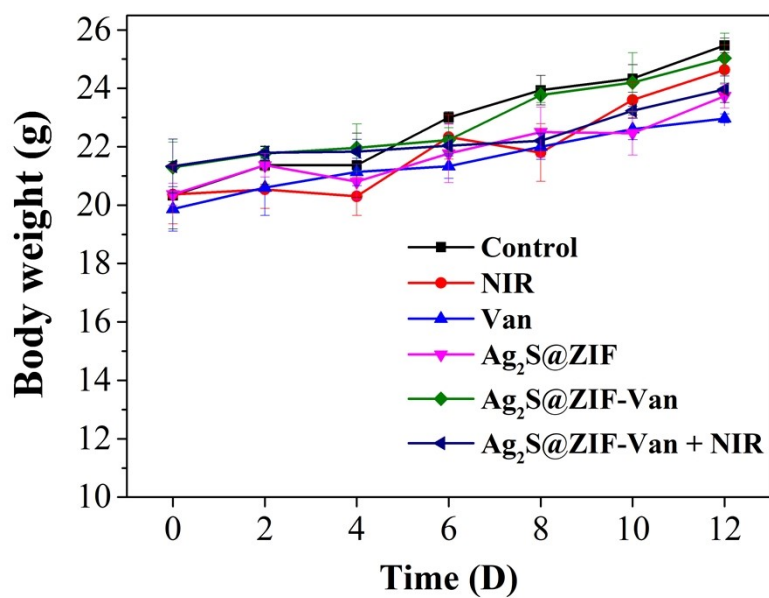

**Fig. S19** Body weight change of mice after different treatments.

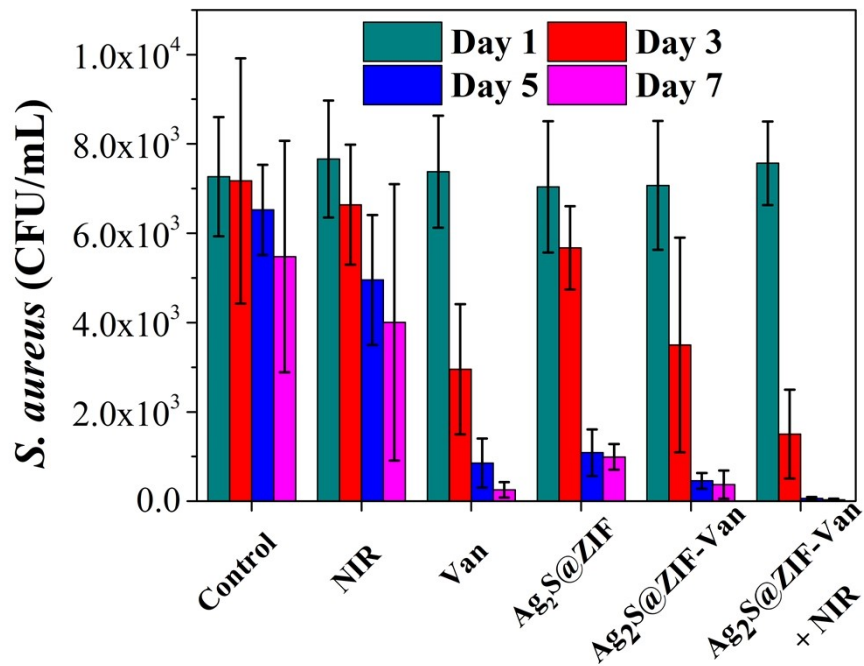

**Fig. S20** The corresponding CFU counts of *S. aureus* colonies from each wounds, (n=3).
